# Supplementary material for: Drive-amplitude-modulation atomic force microscopy: From vacuum to liquids
Source: publisher site journal article supplement (doi:10.3762/bjnano.3.38), 2012-04-18

# Supporting Information

for

## Drive-amplitude-modulation atomic force microscopy:

### From vacuum to liquids

Miriam Jaafar<sup>1</sup>, David Martínez-Martín<sup>\*1</sup>, Mariano Cuenca<sup>2</sup>, John Melcher<sup>3</sup>,  
Arvind Raman<sup>4</sup> and Julio Gómez-Herrero<sup>\*1</sup>

Address: <sup>1</sup>Departamento de Física de la Materia Condensada, Universidad Autónoma de Madrid, E-28049 Madrid, Spain, <sup>2</sup>Servicios generales de apoyo a la investigación, Universidad Autónoma de Madrid, E-28049 Madrid, Spain, <sup>3</sup>Department of Engineering Mathematics, University of Bristol, Bristol BS8 1TR, United Kingdom and <sup>4</sup>Birck Nanotechnology Center and School of Mechanical Engineering, Purdue University, West Lafayette, IN 47904-2088, USA

Email: David Martínez-Martín - davidmmo@gmail.com; Julio Gomez-Herrero - julio.gomez@uam.es

\* Corresponding author

## Dynamic response in DAM-AFM

Within the point-mass approximation a cantilever can be seen as a mass on a spring. Therefore the equation of motion is given by:

$$\frac{d^2x}{dt^2} + \frac{\omega_0}{q} \frac{dx}{dt} + \omega_0^2 = A \cos(\omega_f t)$$

The general solution can be written as:

$$x(t) = \frac{A}{(\omega_0^2 - \omega_f^2) + (\frac{\omega_0}{q}\omega_f)^2} \left( (\omega_0^2 - \omega_f^2) \left( \cos(\omega_f t) - e^{-\frac{\omega_0}{2q}t} \cos(\omega_0 t) \right) + \frac{\omega_0}{q} \omega_f \left( \sin(\omega_0 t) - \frac{\omega_0^2 + \omega_f^2}{2\omega_0 \omega_f} e^{-\frac{\omega_0}{2q}t} \sin(\omega_0 t) \right) \right)$$

The use of a phase-locked loop implies that  $\omega_0 = \omega_f$  and thus:

$$x(t) = \frac{Aq}{\omega_0^2} \left( \sin(\omega_0 t) - e^{-\frac{\omega_0}{2q}t} \sin(\omega_0 t) \right)$$

The standard procedure to readout the oscillation amplitude is to use a lock-in amplifier, which first multiplies the previous solution by a reference signal ( $\omega_0 t$ ). The result of this operation is a dc component proportional to the signal amplitude plus a  $2\omega_0$  component, which is usually removed with a low-pass filter. After these operations the output of the lock-in amplifier reads as:

$$A_{out} = \frac{Aq}{2\omega_0^2} \left( 1 - e^{-\frac{\omega_0}{2q}t} \right)$$

With a constant time  $\tau = \frac{2q}{\omega_0}$

This corresponds to a system with a transfer function G:

$$G = \frac{1}{s + \frac{\omega_0}{2q}}$$

$$H = K_p$$

If feedback is performed then these values are modified as follows:

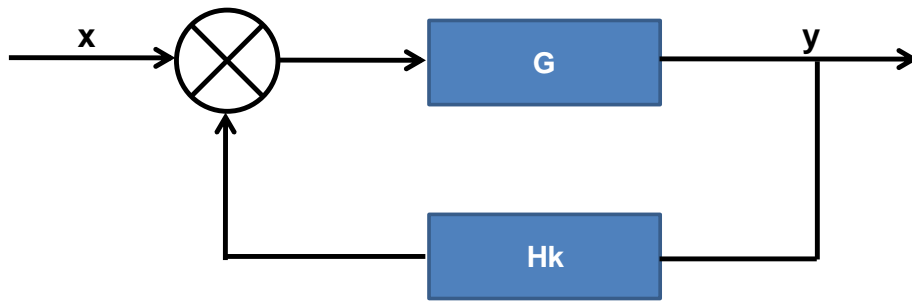

$$\frac{y}{x} = \frac{G}{1 + GK}$$

$$\frac{y}{x} = \frac{1}{s + \frac{\omega_0}{2q} + \frac{K_p}{4\omega_0}}$$

And the time response:

$$A_{out} = \frac{Aq}{2\omega_0^2 + K_p q} \left( 1 - e^{-\left(\frac{\omega_0}{2q} + \frac{K_p}{4\omega_0}\right)t} \right)$$

As we can see, the new time constant is:

$$\tau = \frac{4q\omega_0}{2\omega_0^2 + K_p q}$$

This involves the gain  $K_p$  of the feedback loop. As a consequence the time response can be arbitrarily reduced by tuning the feedback gain.

This analysis was performed using a feedback that only includes a proportional gain, since this is the most important parameter to regulate the amplitude of cantilever. However the analysis could be easily generalized to include an integral or even a differential gain.

# Open loop

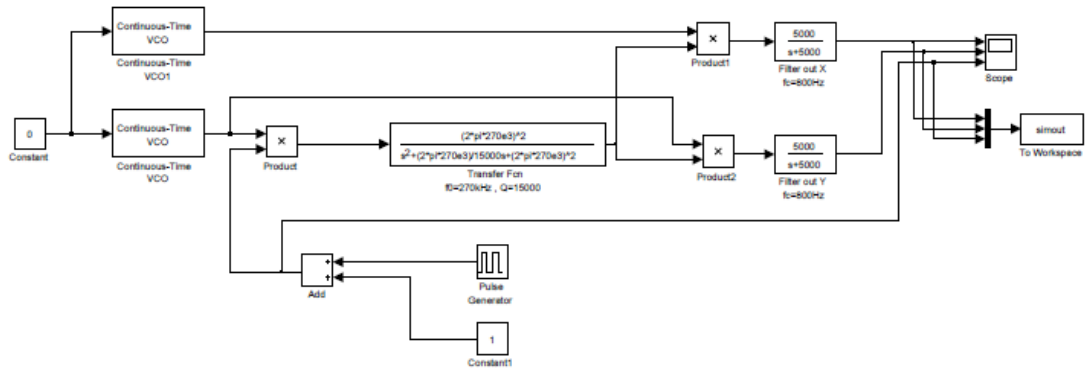

# Closed loop

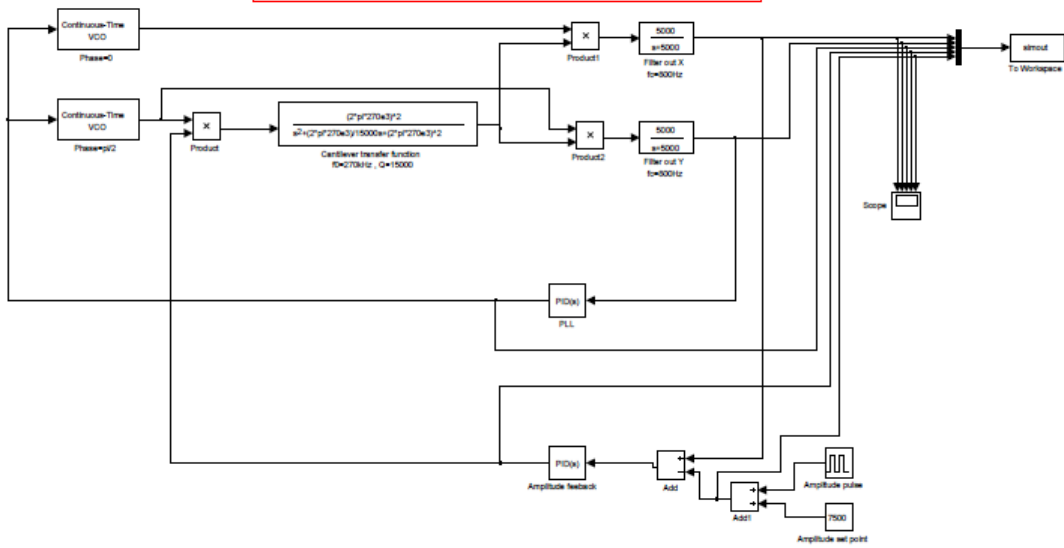

Supplement: Additional file 2 [file 2190-4286-3-38-S2.pdf]
